# Supplementary material for: Green synthesis of silver nanoparticles in aloe vera plant extract prepared by a hydrothermal method and their synergistic antibacterial activity
Source: PeerJ. 2016 Oct 19;4:e2589. doi: 10.7717/peerj.2589 (PMC5075710; doi:10.7717/peerj.2589)
Supplement: Supplemental Information 2 [file peerj-04-2589-s002.xlsx]

## Sheet: 6h
XRD analysis
2θ (degree)	100 OC	150 OC	100 OC
20.01	4	1	2
20.03	2	2	3
20.05	3	1	1
20.07	4	0	1
20.09	1	1	1
20.11	2	0	3
20.13	1	2	1
20.15	4	4	4
20.17	6	2	1
20.19	2	0	1
20.21	3	2	3
20.23	7	0	3
20.25	4	0	2
20.27	3	0	2
20.29	3	0	2
20.31	2	1	0
20.33	2	3	0
20.35	1	2	0
20.37	1	0	0
20.39	1	1	0
20.41	2	3	0
20.43	2	0	1
20.45	3	2	0
20.47	4	1	0
20.49	3	2	0
20.51	5	1	0
20.53	4	0	0
20.55	4	0	2
20.57	3	1	2
20.59	2	1	2
20.61	2	1	2
20.63	5	4	2
20.65	4	3	3
20.67	1	1	4
20.69	4	4	2
20.71	1	0	2
20.73	4	2	2
20.75	3	2	2
20.77	3	2	2
20.79	4	1	2
20.81	2	0	1
20.83	2	0	1
20.85	2	1	1
20.87	2	1	1
20.89	3	2	1
20.91	3	3	1
20.93	2	2	1
20.95	1	0	0
20.97	3	1	0
20.99	2	1	0
21.01	2	1	0
21.03	4	1	0
21.05	4	2	3
21.07	4	2	3
21.09	3	1	4
21.11	6	5	4
21.13	1	0	5
21.15	2	1	2
21.17	4	3	2
21.19	1	1	2
21.21	2	2	2
21.23	1	0	2
21.25	4	2	1
21.27	2	1	1
21.29	2	1	1
21.31	3	0	1
21.33	3	1	1
21.35	3	1	1
21.37	2	0	1
21.39	2	1	1
21.41	2	1	1
21.43	3	2	1
21.45	3	2	0
21.47	1	1	0
21.49	0	0	0
21.51	2	1	0
21.53	4	2	0
21.55	2	1	0
21.57	1	0	0
21.59	5	2	0
21.61	3	1	0
21.63	2	0	0
21.65	4	3	0
21.67	3	2	0
21.69	4	3	2
21.71	0	0	1
21.73	1	1	1
21.75	1	0	2
21.77	5	3	1
21.79	2	1	3
21.81	2	1	0
21.83	3	0	0
21.85	4	2	0
21.87	3	1	0
21.89	2	0	0
21.91	2	1	1
21.93	2	1	0
21.95	2	1	0
21.97	2	1	0
21.99	3	3	3
22.01	1	1	1
22.03	4	3	2
22.05	2	0	1
22.07	1	0	0
22.09	2	1	1
22.11	4	1	0
22.13	3	1	2
22.15	3	1	4
22.17	2	0	2
22.19	3	2	0
22.21	1	0	2
22.23	2	1	0
22.25	2	1	0
22.27	2	2	0
22.29	1	1	0
22.31	4	3	1
22.33	3	1	3
22.35	2	1	2
22.37	4	3	0
22.39	3	0	1
22.41	3	1	3
22.43	2	0	0
22.45	2	1	2
22.47	2	1	1
22.49	2	1	2
22.51	1	1	1
22.53	1	1	0
22.55	3	2	0
22.57	2	0	1
22.59	1	0	1
22.61	3	2	1
22.63	5	2	4
22.65	2	0	3
22.67	4	2	1
22.69	4	2	4
22.71	3	2	0
22.73	1	0	2
22.75	2	1	2
22.77	1	0	2
22.79	0	0	1
22.81	1	1	0
22.83	2	1	0
22.85	2	0	1
22.87	2	1	1
22.89	1	0	2
22.91	7	4	3
22.93	3	1	2
22.95	5	3	0
22.97	4	2	1
22.99	2	1	1
23.01	1	0	1
23.03	2	1	1
23.05	2	1	2
23.07	4	4	2
23.09	2	2	1
23.11	2	1	5
23.13	2	0	0
23.15	2	1	1
23.17	3	2	3
23.19	6	3	1
23.21	2	0	2
23.23	2	0	0
23.25	1	0	2
23.27	4	3	1
23.29	2	1	1
23.31	0	0	0
23.33	1	1	1
23.35	4	3	1
23.37	5	3	0
23.39	1	0	1
23.41	2	1	1
23.43	4	1	2
23.45	3	1	2
23.47	2	0	1
23.49	4	2	0
23.51	2	1	1
23.53	3	2	2
23.55	2	1	1
23.57	2	1	0
23.59	1	1	2
23.61	2	2	1
23.63	4	3	0
23.65	2	0	3
23.67	3	2	2
23.69	1	0	3
23.71	4	1	0
23.73	3	1	1
23.75	3	1	0
23.77	3	1	3
23.79	3	2	1
23.81	3	2	1
23.83	4	3	0
23.85	2	1	2
23.87	1	1	1
23.89	4	4	0
23.91	2	1	1
23.93	6	4	1
23.95	1	0	1
23.97	1	0	1
23.99	4	1	3
24.01	2	0	1
24.03	4	2	3
24.05	0	0	0
24.07	1	1	0
24.09	0	0	1
24.11	2	2	1
24.13	1	1	1
24.15	1	1	1
24.17	0	0	0
24.19	1	1	2
24.21	2	2	0
24.23	1	1	1
24.25	3	3	1
24.27	1	1	2
24.29	1	1	1
24.31	1	1	3
24.33	1	1	1
24.35	2	2	1
24.37	1	1	3
24.39	2	2	0
24.41	0	0	1
24.43	0	0	0
24.45	2	2	1
24.47	1	1	1
24.49	1	1	1
24.51	1	1	1
24.53	0	0	1
24.55	2	2	2
24.57	2	2	0
24.59	2	2	0
24.61	1	1	2
24.63	1	1	2
24.65	0	0	0
24.67	6	6	2
24.69	4	4	2
24.71	0	0	2
24.73	2	2	0
24.75	1	1	1
24.77	1	1	0
24.79	0	0	0
24.81	1	1	1
24.83	2	2	1
24.85	0	0	0
24.87	0	0	1
24.89	2	2	0
24.91	0	0	4
24.93	2	2	1
24.95	1	1	3
24.97	2	2	2
24.99	1	1	1
25.01	4	4	0
25.03	1	1	1
25.05	0	0	1
25.07	1	1	4
25.09	1	1	2
25.11	2	2	1
25.13	3	3	0
25.15	1	1	1
25.17	1	1	2
25.19	1	1	3
25.21	1	1	0
25.23	2	2	0
25.25	0	0	0
25.27	0	0	3
25.29	1	1	1
25.31	0	0	0
25.33	2	2	1
25.35	1	1	3
25.37	1	1	3
25.39	0	0	0
25.41	1	1	1
25.43	1	1	1
25.45	0	0	1
25.47	2	2	0
25.49	1	1	2
25.51	1	1	1
25.53	2	2	2
25.55	1	1	1
25.57	0	0	1
25.59	1	1	1
25.61	2	2	2
25.63	2	2	3
25.65	0	0	0
25.67	1	1	2
25.69	0	0	0
25.71	1	1	1
25.73	1	1	1
25.75	1	1	1
25.77	1	1	1
25.79	1	1	2
25.81	0	0	2
25.83	0	0	3
25.85	4	4	1
25.87	1	1	1
25.89	2	2	4
25.91	0	0	1
25.93	0	0	4
25.95	0	0	0
25.97	0	0	0
25.99	1	1	1
26.01	1	1	0
26.03	0	0	2
26.05	0	0	0
26.07	0	0	1
26.09	1	1	0
26.11	1	1	2
26.13	1	1	1
26.15	0	0	1
26.17	0	0	0
26.19	1	1	1
26.21	0	0	2
26.23	0	0	1
26.25	1	1	3
26.27	0	0	1
26.29	1	1	1
26.31	1	1	1
26.33	2	2	1
26.35	2	2	2
26.37	0	0	1
26.39	1	1	2
26.41	0	0	0
26.43	0	0	0
26.45	3	3	2
26.47	1	1	1
26.49	1	1	1
26.51	1	1	1
26.53	2	2	0
26.55	1	1	2
26.57	0	0	2
26.59	0	0	2
26.61	0	0	1
26.63	2	2	1
26.65	1	1	0
26.67	3	3	6
26.69	2	2	4
26.71	2	2	0
26.73	1	1	2
26.75	2	2	1
26.77	3	3	1
26.79	0	0	0
26.81	1	1	1
26.83	0	0	2
26.85	1	1	0
26.87	0	0	0
26.89	1	1	2
26.91	0	0	0
26.93	7	7	2
26.95	1	1	1
26.97	1	1	2
26.99	0	0	1
27.01	3	3	4
27.03	1	1	1
27.05	1	1	0
27.07	0	0	1
27.09	3	3	1
27.11	1	1	2
27.13	0	0	3
27.15	0	0	1
27.17	1	1	1
27.19	1	1	1
27.21	2	2	1
27.23	3	3	2
27.25	2	2	0
27.27	0	0	0
27.29	0	0	1
27.31	0	0	0
27.33	1	1	2
27.35	1	1	1
27.37	1	1	1
27.39	1	1	0
27.41	1	1	1
27.43	0	0	1
27.45	2	2	0
27.47	1	1	2
27.49	4	4	1
27.51	2	2	1
27.53	2	2	2
27.55	0	0	1
27.57	3	3	0
27.59	0	0	1
27.61	1	1	2
27.63	0	0	2
27.65	0	0	0
27.67	2	2	1
27.69	0	0	0
27.71	4	4	1
27.73	1	1	1
27.75	6	6	1
27.77	4	4	1
27.79	2	2	1
27.81	1	1	0
27.83	2	2	0
27.85	1	1	4
27.87	7	7	1
27.89	6	6	2
27.91	2	2	0
27.93	4	4	0
27.95	8	8	0
27.97	11	11	0
27.99	7	7	1
28.01	2	2	1
28.03	5	5	0
28.05	7	7	0
28.07	1	1	0
28.09	2	2	1
28.11	0	0	1
28.13	0	0	1
28.15	2	2	0
28.17	1	1	0
28.19	3	3	1
28.21	3	3	0
28.23	3	3	0
28.25	0	0	1
28.27	0	0	0
28.29	0	0	1
28.31	1	1	1
28.33	3	3	2
28.35	2	2	2
28.37	2	2	0
28.39	1	1	1
28.41	0	0	0
28.43	1	1	0
28.45	0	0	3
28.47	1	1	1
28.49	5	5	1
28.51	3	3	1
28.53	0	0	2
28.55	0	0	1
28.57	1	1	0
28.59	0	0	0
28.61	1	1	0
28.63	0	0	2
28.65	2	2	1
28.67	1	1	3
28.69	2	2	2
28.71	1	1	2
28.73	2	2	1
28.75	0	0	2
28.77	1	1	3
28.79	1	1	0
28.81	1	1	1
28.83	3	3	0
28.85	6	6	1
28.87	2	2	0
28.89	2	2	1
28.91	1	1	0
28.93	2	2	7
28.95	1	1	1
28.97	0	0	1
28.99	2	2	0
29.01	1	1	1
29.03	1	1	2
29.05	1	1	1
29.07	2	2	0
29.09	2	2	1
29.11	2	2	0
29.13	0	0	2
29.15	1	1	4
29.17	2	2	2
29.19	2	2	0
29.21	2	2	2
29.23	0	0	0
29.25	1	1	0
29.27	1	1	0
29.29	3	3	0
29.31	3	3	1
29.33	1	1	3
29.35	2	2	2
29.37	1	1	0
29.39	2	2	1
29.41	5	5	3
29.43	4	4	0
29.45	4	4	2
29.47	5	5	1
29.49	5	5	2
29.51	7	7	1
29.53	8	8	0
29.55	4	4	0
29.57	7	7	1
29.59	4	4	1
29.61	8	8	1
29.63	7	7	4
29.65	4	4	3
29.67	7	7	1
29.69	7	7	4
29.71	14	12	0
29.73	8	7	2
29.75	16	13	2
29.77	16	14	2
29.79	20	17	1
29.81	17	13	0
29.83	13	11	0
29.85	30	25	1
29.87	33	29	1
29.89	32	30	2
29.91	34	32	3
29.93	35	32	2
29.95	30	26	0
29.97	22	20	1
29.99	23	22	1
30.01	12	10	1
30.03	13	12	1
30.05	13	9	2
30.07	9	7	2
30.09	13	12	1
30.11	4	2	5
30.13	5	13	0
30.15	6	3	1
30.17	7	5	3
30.19	1	1	1
30.21	5	5	2
30.23	5	5	0
30.25	4	4	2
30.27	9	7	1
30.29	2	2	1
30.31	3	3	0
30.33	7	5	1
30.35	4	4	1
30.37	5	0	0
30.39	1	1	1
30.41	2	2	1
30.43	1	0	2
30.45	4	1	2
30.47	4	3	1
30.49	4	1	0
30.51	3	1	1
30.53	3	3	2
30.55	1	1	1
30.57	0	0	0
30.59	5	5	2
30.61	7	5	1
30.63	1	1	0
30.65	2	2	3
30.67	5	3	2
30.69	4	4	3
30.71	8	3	0
30.73	0	0	1
30.75	2	2	0
30.77	1	0	3
30.79	5	2	1
30.81	1	0	1
30.83	5	2	0
30.85	3	1	2
30.87	0	0	1
30.89	0	0	0
30.91	1	1	1
30.93	2	2	1
30.95	4	2	1
30.97	2	2	1
30.99	1	1	3
31.01	2	0	1
31.03	1	1	3
31.05	9	4	0
31.07	1	1	0
31.09	0	0	1
31.11	2	1	1
31.13	4	1	1
31.15	2	1	1
31.17	3	0	0
31.19	5	3	2
31.21	2	2	0
31.23	0	0	1
31.25	0	0	1
31.27	0	0	2
31.29	2	0	1
31.31	2	2	3
31.33	0	0	1
31.35	2	0	1
31.37	2	2	3
31.39	5	0	0
31.41	5	5	1
31.43	0	0	0
31.45	1	0	1
31.47	4	1	1
31.49	4	3	1
31.51	4	1	1
31.53	5	3	1
31.55	1	1	2
31.57	1	1	0
31.59	2	2	0
31.61	4	4	2
31.63	2	0	2
31.65	2	2	0
31.67	2	2	2
31.69	2	0	2
31.71	2	2	2
31.73	5	0	0
31.75	1	1	1
31.77	1	1	0
31.79	4	3	0
31.81	4	1	1
31.83	2	1	1
31.85	3	0	0
31.87	2	0	1
31.89	0	0	0
31.91	0	0	4
31.93	3	3	1
31.95	0	0	3
31.97	3	1	2
31.99	1	1	1
32.01	1	1	0
32.03	6	4	1
32.05	2	2	1
32.07	7	2	4
32.09	2	2	2
32.11	0	0	1
32.13	2	1	0
32.15	6	3	1
32.17	4	3	2
32.19	4	1	3
32.21	5	3	0
32.23	2	2	0
32.25	6	6	0
32.27	4	4	3
32.29	9	9	1
32.31	9	7	0
32.33	23	18	1
32.35	25	22	3
32.37	19	18	3
32.39	33	30	0
32.41	31	24	1
32.43	16	14	1
32.45	19	18	1
32.47	19	16	0
32.49	10	7	2
32.51	7	6	1
32.53	3	2	2
32.55	4	3	1
32.57	2	1	1
32.59	4	4	1
32.61	1	1	2
32.63	4	3	3
32.65	2	0	0
32.67	1	0	2
32.69	1	0	0
32.71	5	2	1
32.73	3	1	1
32.75	4	2	1
32.77	3	1	1
32.79	2	1	2
32.81	2	1	2
32.83	6	5	3
32.85	4	3	1
32.87	2	2	1
32.89	2	2	4
32.91	2	1	1
32.93	2	0	4
32.95	2	1	0
32.97	2	1	0
32.99	4	1	1
33.01	2	0	0
33.03	3	1	2
33.05	3	1	0
33.07	1	0	1
33.09	2	1	0
33.11	2	1	2
33.13	3	2	1
33.15	3	3	1
33.17	2	2	0
33.19	1	0	1
33.21	2	0	2
33.23	2	1	1
33.25	7	6	3
33.27	4	1	1
33.29	4	2	1
33.31	4	2	1
33.33	4	3	1
33.35	2	1	2
33.37	5	4	1
33.39	2	2	2
33.41	0	0	0
33.43	2	1	0
33.45	6	4	2
33.47	2	1	1
33.49	1	0	1
33.51	3	0	1
33.53	4	2	0
33.55	3	1	2
33.57	3	1	2
33.59	3	2	2
33.61	2	1	1
33.63	1	0	1
33.65	3	2	0
33.67	0	0	6
33.69	2	2	4
33.71	1	0	0
33.73	2	0	2
33.75	1	0	1
33.77	2	1	1
33.79	3	0	0
33.81	2	0	1
33.83	2	0	2
33.85	2	0	0
33.87	1	0	0
33.89	3	2	2
33.91	2	1	0
33.93	1	0	2
33.95	0	0	1
33.97	1	1	2
33.99	2	1	1
34.01	3	1	4
34.03	4	3	1
34.05	4	3	0
34.07	3	0	1
34.09	2	0	1
34.11	2	0	2
34.13	1	0	3
34.15	3	2	1
34.17	1	0	1
34.19	2	2	1
34.21	0	0	1
34.23	1	0	2
34.25	3	1	0
34.27	1	0	0
34.29	3	2	1
34.31	3	0	0
34.33	2	0	2
34.35	3	1	1
34.37	2	0	1
34.39	4	3	0
34.41	3	2	1
34.43	4	3	1
34.45	3	2	0
34.47	4	4	2
34.49	1	1	1
34.51	2	1	1
34.53	2	0	2
34.55	2	1	1
34.57	2	1	0
34.59	3	0	1
34.61	4	2	2
34.63	3	1	2
34.65	2	0	0
34.67	2	1	1
34.69	3	2	0
34.71	1	0	1
34.73	2	1	1
34.75	0	0	1
34.77	4	4	1
34.79	1	0	1
34.81	2	0	0
34.83	4	3	0
34.85	2	1	4
34.87	3	0	1
34.89	3	1	2
34.91	3	1	0
34.93	2	1	0
34.95	3	2	0
34.97	3	2	0
34.99	3	3	1
35.01	1	1	1
35.03	2	1	0
35.05	2	0	0
35.07	3	2	0
35.09	1	0	1
35.11	4	1	1
35.13	4	2	1
35.15	3	1	0
35.17	3	1	0
35.19	2	1	1
35.21	3	2	0
35.23	4	3	0
35.25	1	0	1
35.27	4	4	0
35.29	0	0	1
35.31	4	3	1
35.33	2	0	2
35.35	5	4	2
35.37	2	1	0
35.39	4	1	1
35.41	4	2	0
35.43	3	1	0
35.45	7	5	3
35.47	2	1	1
35.49	3	2	1
35.51	1	0	1
35.53	1	0	2
35.55	1	1	1
35.57	2	2	0
35.59	5	4	0
35.61	5	3	0
35.63	3	2	2
35.65	1	0	1
35.67	5	2	3
35.69	3	1	2
35.71	5	3	2
35.73	3	2	1
35.75	2	1	2
35.77	3	2	3
35.79	0	0	0
35.81	2	2	1
35.83	2	1	0
35.85	4	2	1
35.87	1	0	0
35.89	2	1	1
35.91	4	1	0
35.93	3	1	7
35.95	4	2	1
35.97	4	2	1
35.99	1	0	0
36.01	3	2	4
36.03	3	2	2
36.05	1	0	2
36.07	1	1	1
36.09	5	5	2
36.11	3	2	2
36.13	4	2	2
36.15	4	3	2
36.17	4	3	1
36.19	6	3	1
36.21	3	1	2
36.23	2	0	5
36.25	3	1	3
36.27	2	1	3
36.29	3	2	0
36.31	3	2	1
36.33	3	2	0
36.35	2	2	0
36.37	4	4	2
36.39	5	4	0
36.41	2	0	2
36.43	3	2	2
36.45	2	1	3
36.47	6	3	3
36.49	10	8	2
36.51	6	4	4
36.53	4	2	3
36.55	5	4	0
36.57	8	4	8
36.59	5	3	6
36.61	3	2	2
36.63	4	2	3
36.65	7	6	6
36.67	6	3	4
36.69	10	8	5
36.71	3	3	6
36.73	1	1	3
36.75	0	0	2
36.77	1	1	1
36.79	4	2	5
36.81	3	3	5
36.83	2	2	7
36.85	6	4	3
36.87	3	3	5
36.89	8	3	0
36.91	1	1	2
36.93	2	2	2
36.95	4	3	3
36.97	5	2	2
36.99	2	1	3
37.01	5	2	1
37.03	2	0	6
37.05	4	4	6
37.07	3	3	3
37.09	3	3	4
37.11	3	3	5
37.13	6	4	2
37.15	1	1	3
37.17	1	1	2
37.19	3	1	2
37.21	0	0	2
37.23	8	3	2
37.25	2	2	2
37.27	0	0	3
37.29	4	3	4
37.31	5	2	4
37.33	3	2	1
37.35	4	1	5
37.37	5	3	6
37.39	1	1	2
37.41	2	2	2
37.43	6	6	2
37.45	0	0	2
37.47	7	5	2
37.49	2	2	2
37.51	1	1	4
37.53	5	3	1
37.55	4	4	3
37.57	9	4	4
37.59	5	5	5
37.61	6	6	6
37.63	4	3	2
37.65	4	1	3
37.67	1	0	5
37.69	5	2	1
37.71	8	6	2
37.73	10	10	2
37.75	8	8	9
37.77	2	2	8
37.79	6	6	9
37.81	4	2	10
37.83	6	6	12
37.85	3	3	15
37.87	15	13	16
37.89	7	7	15
37.91	18	13	12
37.93	12	16	12
37.95	17	22	11
37.97	14	13	17
37.99	19	16	23
38.01	19	18	24
38.03	22	19	27
38.05	25	23	32
38.07	18	18	35
38.09	29	29	39
38.11	44	44	42
38.13	52	52	45
38.15	57	55	47
38.17	71	71	51
38.19	92	92	55
38.21	110	108	64
38.23	137	137	78
38.25	150	193	87
38.27	1	180	103
38.29	193	193	124
38.31	145	144	136
38.33	147	144	159
38.35	131	130	178
38.37	99	96	230
38.39	88	86	257
38.41	72	72	221
38.43	58	58	201
38.45	23	23	165
38.47	35	35	123
38.49	30	28	67
38.51	27	27	45
38.53	22	22	32
38.55	18	16	33
38.57	22	22	45
38.59	22	17	45
38.61	12	12	32
38.63	16	16	32
38.65	6	5	12
38.67	13	10	28
38.69	13	12	23
38.71	9	6	17
38.73	11	9	17
38.75	4	4	16
38.77	7	7	18
38.79	2	2	19
38.81	0	0	12
38.83	9	7	12
38.85	10	5	11
38.87	10	7	8
38.89	3	2	7
38.91	5	2	8
38.93	14	7	7
38.95	7	5	8
38.97	5	4	6
38.99	5	2	8
39.01	6	3	3
39.03	5	4	4
39.05	7	6	6
39.07	4	3	3
39.09	5	4	4
39.11	2	2	2
39.13	0	0	0
39.15	2	1	1
39.17	4	2	2
39.19	1	0	0
39.21	2	1	1
39.23	5	2	2
39.25	4	2	2
39.27	2	0	0
39.29	3	1	1
39.31	2	1	1
39.33	3	2	2
39.35	1	0	0
39.37	3	2	2
39.39	4	4	4
39.41	2	2	2
39.43	6	5	5
39.45	5	3	3
39.47	7	6	6
39.49	1	0	0
39.51	5	2	2
39.53	7	5	5
39.55	6	4	4
39.57	8	6	6
39.59	3	2	2
39.61	6	2	2
39.63	3	1	1
39.65	2	1	1
39.67	3	1	1
39.69	5	4	4
39.71	6	3	3
39.73	2	0	0
39.75	2	2	2
39.77	1	1	1
39.79	1	1	1
39.81	0	0	0
39.83	3	1	1
39.85	0	0	0
39.87	1	1	1
39.89	6	4	4
39.91	1	1	1
39.93	7	2	2
39.95	1	1	1
39.97	1	1	1
39.99	3	2	2
40.01	4	1	1
40.03	2	1	1
40.05	4	1	1
40.07	4	2	2
40.09	0	0	0
40.11	2	2	2
40.13	0	0	0
40.15	2	2	2
40.17	2	0	0
40.19	0	0	0
40.21	2	2	2
40.23	4	2	2
40.25	0	0	0
40.27	6	1	1
40.29	2	2	2
40.31	1	1	1
40.33	3	2	2
40.35	5	2	2
40.37	2	1	1
40.39	3	0	0
40.41	3	1	1
40.43	1	1	1
40.45	1	1	1
40.47	1	1	1
40.49	1	1	1
40.51	4	2	2
40.53	3	3	3
40.55	0	0	0
40.57	5	3	3
40.59	4	4	4
40.61	8	3	3
40.63	2	2	2
40.65	1	1	1
40.67	3	2	2
40.69	6	3	3
40.71	4	3	3
40.73	4	1	1
40.75	6	4	4
40.77	1	1	1
40.79	1	1	1
40.81	3	3	3
40.83	3	3	3
40.85	4	2	2
40.87	2	2	2
40.89	1	1	1
40.91	2	0	0
40.93	1	1	1
40.95	8	3	3
40.97	1	1	1
40.99	2	2	2
41.01	1	0	3
41.03	8	5	4
41.05	2	1	6
41.07	3	0	3
41.09	2	0	4
41.11	1	1	2
41.13	1	1	0
41.15	2	2	1
41.17	2	2	2
41.19	3	1	0
41.21	1	1	1
41.23	2	2	2
41.25	5	3	2
41.27	2	2	0
41.29	8	3	1
41.31	1	1	1
41.33	2	2	2
41.35	3	2	0
41.37	6	3	2
41.39	3	2	4
41.41	5	2	2
41.43	6	4	5
41.45	3	3	3
41.47	5	5	6
41.49	2	2	0
41.51	4	4	2
41.53	4	2	5
41.55	1	1	4
41.57	3	3	6
41.59	3	1	2
41.61	2	2	2
41.63	5	0	1
41.65	1	1	1
41.67	0	0	1
41.69	4	3	4
41.71	5	2	3
41.73	1	0	0
41.75	5	2	2
41.77	4	2	1
41.79	3	3	1
41.81	4	4	0
41.83	2	2	1
41.85	1	1	0
41.87	7	5	1
41.89	7	2	4
41.91	4	1	1
41.93	2	1	2
41.95	3	0	1
41.97	9	2	1
41.99	3	1	2
42.01	4	3	1
42.03	5	2	1
42.05	4	1	1
42.07	2	1	2
42.09	7	6	0
42.11	6	5	2
42.13	5	4	0
42.15	3	3	2
42.17	0	0	0
42.19	4	3	0
42.21	3	1	2
42.23	5	4	2
42.25	6	5	0
42.27	6	3	1
42.29	5	3	2
42.31	3	1	1
42.33	4	2	2
42.35	5	4	2
42.37	2	1	1
42.39	6	5	0
42.41	2	1	1
42.43	6	6	1
42.45	1	1	1
42.47	4	3	1
42.49	8	6	1
42.51	3	2	2
42.53	3	2	3
42.55	8	5	0
42.57	5	3	3
42.59	6	4	4
42.61	6	4	3
42.63	5	4	2
42.65	8	4	1
42.67	4	2	2
42.69	4	3	3
42.71	5	3	3
42.73	5	4	1
42.75	5	2	4
42.77	5	3	1
42.79	4	4	1
42.81	3	3	3
42.83	4	4	3
42.85	2	2	2
42.87	6	4	2
42.89	3	3	1
42.91	2	2	0
42.93	4	2	1
42.95	3	3	3
42.97	6	1	1
42.99	0	0	2
43.01	2	2	3
43.03	1	0	4
43.05	6	3	6
43.07	6	5	3
43.09	4	1	4
43.11	4	2	2
43.13	3	3	0
43.15	1	1	1
43.17	3	3	2
43.19	1	1	0
43.21	2	0	1
43.23	1	1	2
43.25	2	2	2
43.27	5	3	0
43.29	4	4	1
43.31	6	1	1
43.33	2	2	2
43.35	2	2	0
43.37	3	2	2
43.39	3	0	4
43.41	3	2	2
43.43	4	1	5
43.45	3	1	3
43.47	3	3	6
43.49	0	0	0
43.51	3	3	2
43.53	3	3	5
43.55	4	2	4
43.57	2	2	6
43.59	0	0	2
43.61	3	1	2
43.63	3	3	1
43.65	9	4	1
43.67	3	3	1
43.69	0	0	4
43.71	6	5	3
43.73	9	6	0
43.75	8	7	2
43.77	6	3	1
43.79	5	3	1
43.81	3	3	0
43.83	3	3	1
43.85	3	3	0
43.87	1	1	1
43.89	9	7	4
43.91	5	5	1
43.93	5	5	5
43.95	7	5	6
43.97	9	9	5
43.99	13	8	5
44.01	4	4	4
44.03	10	10	4
44.05	14	13	4
44.07	11	8	7
44.09	8	7	7
44.11	15	12	8
44.13	14	12	8
44.15	12	12	8
44.17	12	12	8
44.19	16	16	10
44.21	15	15	12
44.23	19	17	12
44.25	24	24	11
44.27	29	29	17
44.29	32	30	21
44.31	35	35	22
44.33	40	35	25
44.35	44	44	32
44.37	44	44	33
44.39	46	45	35
44.41	59	56	37
44.43	72	71	38
44.45	82	79	39
44.47	79	77	43
44.49	50	50	45
44.51	56	56	56
44.53	67	67	65
44.55	50	50	76
44.57	58	56	93
44.59	44	44	112
44.61	32	32	94
44.63	26	24	74
44.65	21	21	65
44.67	21	16	54
44.69	24	24	53
44.71	17	17	54
44.73	11	10	56
44.75	13	10	42
44.77	11	10	34
44.79	26	23	25
44.81	9	7	23
44.83	6	6	15
44.85	6	6	11
44.87	6	6	7
44.89	9	9	8
44.91	7	5	8
44.93	8	3	6
44.95	11	8	7
44.97	6	5	6
44.99	7	4	7
45.01	12	5	5
45.03	4	2	2
45.05	6	5	5
45.07	6	3	3
45.09	3	0	0
45.11	1	0	0
45.13	3	2	2
45.15	2	1	1
45.17	3	2	2
45.19	4	4	4
45.21	3	3	3
45.23	8	7	7
45.25	4	2	2
45.27	3	2	2
45.29	3	2	2
45.31	4	1	1
45.33	5	3	3
45.35	5	3	3
45.37	3	1	1
45.39	4	3	3
45.41	2	1	1
45.43	1	0	0
45.45	5	4	4
45.47	5	5	5
45.49	3	3	3
45.51	2	1	1
45.53	3	1	1
45.55	4	3	3
45.57	3	2	2
45.59	6	3	3
45.61	5	3	3
45.63	5	3	3
45.65	2	0	0
45.67	4	3	3
45.69	8	4	4
45.71	2	0	0
45.73	4	3	3
45.75	2	0	0
45.77	5	4	4
45.79	4	1	1
45.81	4	2	2
45.83	1	1	1
45.85	4	4	4
45.87	2	2	2
45.89	2	2	2
45.91	2	0	0
45.93	4	4	4
45.95	1	1	1
45.97	7	5	5
45.99	1	1	1
46.01	5	0	4
46.03	0	0	2
46.05	4	4	3
46.07	3	2	4
46.09	11	8	1
46.11	5	4	2
46.13	4	1	1
46.15	8	6	4
46.17	9	9	6
46.19	4	4	2
46.21	5	5	3
46.23	4	4	7
46.25	8	6	4
46.27	6	6	3
46.29	6	6	3
46.31	16	11	2
46.33	16	7	2
46.35	21	18	1
46.37	22	17	1
46.39	20	16	1
46.41	11	8	2
46.43	16	11	2
46.45	7	6	3
46.47	19	16	4
46.49	14	12	3
46.51	9	9	5
46.53	13	13	4
46.55	8	8	4
46.57	8	8	3
46.59	7	5	2
46.61	4	4	2
46.63	1	1	5
46.65	6	4	4
46.67	3	3	1
46.69	6	1	4
46.71	4	4	1
46.73	2	2	4
46.75	3	2	3
46.77	3	0	3
46.79	3	2	4
46.81	6	3	2
46.83	3	1	2
46.85	2	2	2
46.87	3	3	2
46.89	3	3	3
46.91	1	1	3
46.93	2	0	2
46.95	0	0	1
46.97	0	0	3
46.99	3	1	2
47.01	2	2	2
47.03	5	0	4
47.05	0	0	4
47.07	0	0	4
47.09	2	1	3
47.11	3	0	6
47.13	6	5	1
47.15	3	0	2
47.17	6	4	4
47.19	4	4	1
47.21	1	1	2
47.23	3	3	1
47.25	2	2	4
47.27	5	3	2
47.29	3	3	2
47.31	1	1	3
47.33	3	1	3
47.35	1	1	3
47.37	7	2	2
47.39	4	4	2
47.41	2	2	2
47.43	2	1	3
47.45	4	1	3
47.47	1	0	1
47.49	4	1	0
47.51	4	2	2
47.53	1	1	4
47.55	1	1	2
47.57	1	1	1
47.59	2	2	5
47.61	5	3	3
47.63	1	1	2
47.65	5	5	4
47.67	7	5	3
47.69	2	2	4
47.71	7	2	0
47.73	2	2	1
47.75	3	3	1
47.77	3	2	5
47.79	6	3	2
47.81	2	1	2
47.83	3	0	3
47.85	5	3	4
47.87	0	0	3
47.89	4	4	2
47.91	3	3	2
47.93	4	4	2
47.95	4	2	2
47.97	6	1	2
47.99	4	1	3
48.01	1	0	1
48.03	4	1	4
48.05	8	1	2
48.07	4	2	1
48.09	5	4	2
48.11	3	0	4
48.13	3	0	3
48.15	2	1	3
48.17	2	1	2
48.19	5	4	3
48.21	2	1	1
48.23	2	2	2
48.25	1	1	2
48.27	1	0	2
48.29	4	2	1
48.31	1	0	4
48.33	2	1	3
48.35	3	0	2
48.37	6	4	4
48.39	3	1	3
48.41	2	0	3
48.43	1	0	2
48.45	4	3	2
48.47	2	1	2
48.49	2	1	2
48.51	1	1	1
48.53	1	1	1
48.55	2	1	3
48.57	5	3	2
48.59	2	1	1
48.61	6	5	3
48.63	4	1	5
48.65	2	0	2
48.67	7	5	4
48.69	3	2	4
48.71	4	1	3
48.73	7	5	1
48.75	3	3	2
48.77	0	0	1
48.79	2	2	0
48.81	2	2	1
48.83	4	2	2
48.85	2	2	2
48.87	1	1	2
48.89	5	3	1
48.91	0	0	7
48.93	5	0	3
48.95	1	1	5
48.97	2	2	4
48.99	4	3	2
49.01	3	0	1
49.03	3	2	2
49.05	6	3	2
49.07	4	2	4
49.09	1	1	2
49.11	1	1	2
49.13	0	0	2
49.15	2	2	2
49.17	4	2	3
49.19	3	3	6
49.21	0	0	2
49.23	2	0	2
49.25	1	1	1
49.27	7	2	4
49.29	2	2	2
49.31	0	0	0
49.33	4	3	1
49.35	7	4	4
49.37	2	1	5
49.39	6	3	1
49.41	4	2	2
49.43	3	3	4
49.45	2	2	3
49.47	2	2	2
49.49	1	1	4
49.51	4	2	2
49.53	3	3	3
49.55	2	2	2
49.57	4	2	2
49.59	3	3	1
49.61	7	2	2
49.63	3	3	4
49.65	2	2	2
49.67	2	1	3
49.69	7	4	1
49.71	1	0	4
49.73	3	0	3
49.75	4	2	3
49.77	3	3	3
49.79	0	0	3
49.81	1	1	3
49.83	1	1	4
49.85	6	4	2
49.87	1	1	1
49.89	2	2	4
49.91	5	3	2
49.93	0	0	6
49.95	6	1	1
49.97	2	2	1
49.99	3	3	4
50.01	2	1	4
50.03	4	1	2
50.05	5	4	3
50.07	3	0	4
50.09	4	2	1
50.11	0	0	2
50.13	0	0	1
50.15	4	4	4
50.17	4	4	6
50.19	4	3	2
50.21	5	2	3
50.23	4	2	7
50.25	0	0	4
50.27	3	3	3
50.29	2	2	3
50.31	1	1	2
50.33	5	3	2
50.35	3	3	1
50.37	0	0	1
50.39	2	0	1
50.41	0	0	2
50.43	8	3	2
50.45	2	2	3
50.47	2	2	4
50.49	1	0	3
50.51	3	0	5
50.53	3	2	4
50.55	4	1	4
50.57	3	1	3
50.59	0	0	2
50.61	0	0	2
50.63	0	0	5
50.65	0	0	4
50.67	4	2	1
50.69	0	0	4
50.71	5	5	1
50.73	2	0	4
50.75	1	1	3
50.77	6	1	3
50.79	1	1	4
50.81	1	1	2
50.83	1	0	2
50.85	5	2	2
50.87	2	1	2
50.89	4	1	3
50.91	6	4	3
50.93	2	2	2
50.95	0	0	1
50.97	2	2	3
50.99	2	2	2
51.01	6	4	2
51.03	4	4	4
51.05	2	2	4
51.07	6	4	4
51.09	2	2	3
51.11	6	1	6
51.13	1	1	1
51.15	3	3	2
51.17	1	0	4
51.19	3	0	1
51.21	1	0	2
51.23	5	2	1
51.25	3	1	4
51.27	4	4	2
51.29	0	0	2
51.31	0	0	3
51.33	0	0	3
51.35	2	0	3
51.37	2	2	2
51.39	4	4	2
51.41	3	1	2
51.43	1	1	3
51.45	6	1	3
51.47	4	4	1
51.49	3	3	0
51.51	1	0	2
51.53	3	0	4
51.55	3	2	2
51.57	3	0	1
51.59	2	0	5
51.61	3	3	3
51.63	1	1	2
51.65	2	2	4
51.67	1	1	3
51.69	2	1	4
51.71	6	3	0
51.73	3	1	1
51.75	0	0	1
51.77	1	1	5
51.79	2	2	2
51.81	0	0	2
51.83	3	1	3
51.85	0	0	4
51.87	1	1	3
51.89	5	3	2
51.91	3	3	2
51.93	6	1	2
51.95	1	1	2
51.97	0	0	2
51.99	2	1	3
52.01	5	2	1
52.03	3	2	4
52.05	4	1	2
52.07	4	2	1
52.09	1	1	2
52.11	1	1	4
52.13	0	0	3
52.15	2	2	3
52.17	3	1	2
52.19	3	3	3
52.21	1	1	1
52.23	4	2	2
52.25	2	2	2
52.27	8	3	2
52.29	0	0	1
52.31	2	2	4
52.33	4	3	3
52.35	6	3	2
52.37	3	2	4
52.39	3	0	3
52.41	3	1	3
52.43	1	1	2
52.45	3	3	2
52.47	1	1	2
52.49	1	1	2
52.51	4	2	1
52.53	2	2	1
52.55	3	3	3
52.57	4	2	2
52.59	1	1	1
52.61	7	2	3
52.63	4	4	5
52.65	1	1	2
52.67	4	3	4
52.69	3	0	4
52.71	1	0	3
52.73	5	2	1
52.75	3	1	2
52.77	1	1	1
52.79	2	2	0
52.81	1	1	1
52.83	3	3	2
52.85	7	5	2
52.87	4	4	2
52.89	0	0	1
52.91	7	5	7
52.93	3	3	3
52.95	8	3	5
52.97	4	4	4
52.99	2	2	2
53.01	7	6	1
53.03	4	1	2
53.05	6	5	2
53.07	5	2	4
53.09	6	4	2
53.11	2	2	2
53.13	3	3	2
53.15	2	2	2
53.17	5	5	3
53.19	4	3	6
53.21	5	2	2
53.23	5	3	2
53.25	2	2	1
53.27	2	2	4
53.29	0	0	2
53.31	4	4	0
53.33	4	2	1
53.35	1	1	4
53.37	3	3	5
53.39	6	4	1
53.41	3	3	2
53.43	8	3	4
53.45	3	3	3
53.47	3	3	2
53.49	2	1	4
53.51	5	2	2
53.53	3	2	3
53.55	5	2	2
53.57	3	1	2
53.59	2	2	1
53.61	3	3	2
53.63	1	1	4
53.65	1	1	2
53.67	3	1	3
53.69	1	1	1
53.71	1	1	4
53.73	3	1	3
53.75	0	0	3
53.77	5	0	3
53.79	2	2	3
53.81	0	0	3
53.83	4	3	4
53.85	5	2	2
53.87	2	1	1
53.89	3	0	4
53.91	5	3	2
53.93	1	1	6
53.95	3	3	1
53.97	1	1	1
53.99	0	0	4
54.01	3	1	2
54.03	1	1	4
54.05	0	0	0
54.07	7	5	1
54.09	2	2	0
54.11	5	0	2
54.13	3	3	1
54.15	0	0	1
54.17	4	3	0
54.19	4	1	1
54.21	3	2	2
54.23	3	0	1
54.25	2	0	3
54.27	1	1	1
54.29	0	0	1
54.31	2	2	1
54.33	2	2	1
54.35	4	2	2
54.37	4	4	1
54.39	0	0	2
54.41	3	1	0
54.43	1	1	0
54.45	6	1	2
54.47	0	0	1
54.49	0	0	1
54.51	2	1	1
54.53	4	1	0
54.55	2	1	2
54.57	4	1	2
54.59	4	2	2
54.61	0	0	1
54.63	2	2	1
54.65	1	1	0
54.67	4	4	6
54.69	1	1	4
54.71	10	5	0
54.73	3	3	2
54.75	0	0	1
54.77	5	4	1
54.79	6	3	0
54.81	4	3	1
54.83	6	3	2
54.85	2	0	0
54.87	2	2	0
54.89	2	2	2
54.91	3	3	0
54.93	4	4	2
54.95	8	6	1
54.97	6	6	2
54.99	4	4	1
55.01	7	5	4
55.03	5	5	1
55.05	8	3	0
55.07	4	4	1
55.09	2	2	1
55.11	6	5	2
55.13	7	4	3
55.15	7	6	1
55.17	6	3	1
55.19	4	2	1
55.21	0	0	1
55.23	4	4	2
55.25	2	2	0
55.27	4	4	0
55.29	4	2	1
55.31	0	0	0
55.33	1	1	2
55.35	4	2	1
55.37	2	2	1
55.39	7	2	0
55.41	2	2	1
55.43	3	3	1
55.45	1	0	0
55.47	3	0	2
55.49	3	2	1
55.51	5	2	1
55.53	3	1	2
55.55	1	1	1
55.57	3	3	0
55.59	2	2	1
55.61	0	0	2
55.63	3	1	2
55.65	4	4	0
55.67	2	2	1
55.69	3	1	0
55.71	1	1	1
55.73	7	2	1
55.75	2	2	1
55.77	0	0	1
55.79	2	1	1
55.81	4	1	0
55.83	1	0	0
55.85	3	0	4
55.87	2	0	1
55.89	2	2	2
55.91	1	1	0
55.93	3	3	0
55.95	3	3	0
55.97	2	0	0
55.99	6	1	1
56.01	3	0	4
56.03	2	1	2
56.05	4	1	3
56.07	7	0	4
56.09	2	0	1
56.11	1	0	2
56.13	5	2	1
56.15	6	3	4
56.17	2	1	6
56.19	3	2	2
56.21	1	0	3
56.23	2	1	7
56.25	1	1	4
56.27	0	0	3
56.29	2	1	3
56.31	4	2	2
56.33	2	1	2
56.35	1	0	1
56.37	7	4	1
56.39	3	1	1
56.41	3	1	2
56.43	4	2	2
56.45	4	3	3
56.47	7	6	4
56.49	3	2	3
56.51	2	1	5
56.53	0	0	4
56.55	2	2	4
56.57	3	2	3
56.59	2	0	2
56.61	2	1	2
56.63	3	2	5
56.65	5	2	4
56.67	3	1	1
56.69	5	3	4
56.71	3	2	1
56.73	3	0	4
56.75	2	0	3
56.77	0	0	3
56.79	2	2	4
56.81	2	2	2
56.83	1	1	2
56.85	3	1	2
56.87	0	0	2
56.89	1	1	3
56.91	4	2	3
56.93	1	1	2
56.95	5	0	1
56.97	1	1	3
56.99	0	0	2
57.01	7	6	2
57.03	3	0	4
57.05	2	1	4
57.07	5	2	4
57.09	5	3	3
57.11	2	2	6
57.13	1	1	1
57.15	3	3	2
57.17	1	1	4
57.19	4	2	1
57.21	1	1	2
57.23	3	3	1
57.25	3	1	4
57.27	2	2	2
57.29	6	1	2
57.31	0	0	3
57.33	2	2	3
57.35	3	2	3
57.37	5	2	2
57.39	1	0	2
57.41	4	1	2
57.43	5	3	3
57.45	5	5	3
57.47	1	1	1
57.49	3	3	0
57.51	3	3	2
57.53	7	5	4
57.55	2	2	2
57.57	6	6	1
57.59	11	9	5
57.61	5	5	3
57.63	11	6	2
57.65	10	10	4
57.67	3	3	3
57.69	5	4	4
57.71	9	6	0
57.73	1	0	1
57.75	7	4	1
57.77	13	11	5
57.79	2	2	2
57.81	0	0	2
57.83	2	2	3
57.85	3	3	4
57.87	5	3	3
57.89	2	2	2
57.91	4	4	2
57.93	3	1	2
57.95	1	1	2
57.97	7	2	2
57.99	2	2	3
58.01	2	2	1
58.03	3	2	4
58.05	7	4	2
58.07	5	4	1
58.09	5	2	2
58.11	3	1	4
58.13	2	2	3
58.15	1	1	3
58.17	1	1	2
58.19	4	4	3
58.21	2	1	1
58.23	4	1	2
58.25	3	1	2
58.27	4	4	2
58.29	1	1	1
58.31	5	5	4
58.33	3	3	3
58.35	5	3	2
58.37	4	4	4
58.39	1	1	3
58.41	4	2	3
58.43	2	2	2
58.45	5	0	2
58.47	2	2	2
58.49	2	2	2
58.51	2	1	1
58.53	5	2	1
58.55	2	1	3
58.57	5	2	2
58.59	4	2	1
58.61	3	3	3
58.63	0	0	5
58.65	1	1	2
58.67	2	2	4
58.69	2	0	4
58.71	1	1	3
58.73	1	1	1
58.75	5	3	2
58.77	0	0	1
58.79	5	0	0
58.81	1	1	1
58.83	1	1	2
58.85	2	1	2
58.87	5	2	2
58.89	1	0	1
58.91	9	6	7
58.93	4	2	3
58.95	1	1	5
58.97	5	5	4
58.99	2	2	2
59.01	0	0	1
59.03	4	2	2
59.05	0	0	2
59.07	0	0	4
59.09	3	1	2
59.11	3	3	2
59.13	5	0	2
59.15	4	4	2
59.17	2	2	3
59.19	5	4	6
59.21	4	1	2
59.23	3	2	2
59.25	4	1	1
59.27	3	1	4
59.29	1	1	2
59.31	2	2	0
59.33	0	0	1
59.35	3	3	4
59.37	2	0	5
59.39	0	0	1
59.41	4	4	2
59.43	4	2	4
59.45	1	1	3
59.47	5	0	2
59.49	2	2	4
59.51	2	2	2
59.53	5	4	3
59.55	5	2	2
59.57	2	1	2
59.59	4	1	1
59.61	4	2	2
59.63	1	1	4
59.65	3	3	2
59.67	5	5	3
59.69	5	5	1
59.71	1	0	4
59.73	5	2	3
59.75	2	0	3
59.77	0	0	3
59.79	4	4	3
59.81	1	1	3
59.83	0	0	4
59.85	4	2	2
59.87	2	2	1
59.89	3	3	4
59.91	2	0	2
59.93	1	1	6
59.95	5	0	1
[truncated: 1,002 more rows]

## Sheet: 12h
XRD analysis
2θ (degree)	100 OC	150 OC	100 OC
20.01	1	1	1
20.03	2	2	0
20.05	2	1	0
20.07	1	0	2
20.09	1	1	2
20.11	0	0	0
20.13	0	2	1
20.15	1	4	1
20.17	2	2	3
20.19	1	0	2
20.21	2	2	0
20.23	1	0	3
20.25	1	0	2
20.27	0	0	1
20.29	1	0	0
20.31	3	1	0
20.33	3	3	2
20.35	0	2	0
20.37	2	0	1
20.39	1	1	3
20.41	5	3	1
20.43	1	0	0
20.45	2	2	0
20.47	3	1	0
20.49	0	2	1
20.51	2	1	1
20.53	0	0	0
20.55	2	0	2
20.57	0	1	3
20.59	0	1	0
20.61	1	1	2
20.63	4	4	0
20.65	0	3	2
20.67	0	1	2
20.69	1	4	1
20.71	0	0	2
20.73	1	2	1
20.75	0	2	1
20.77	1	2	0
20.79	0	1	1
20.81	1	0	0
20.83	0	0	0
20.85	2	1	2
20.87	2	1	0
20.89	1	2	3
20.91	0	3	1
20.93	1	2	0
20.95	1	0	0
20.97	2	1	2
20.99	0	1	0
21.01	2	1	1
21.03	0	1	0
21.05	1	2	1
21.07	1	2	1
21.09	1	1	2
21.11	3	5	1
21.13	1	0	1
21.15	1	1	0
21.17	0	3	1
21.19	0	1	1
21.21	1	2	1
21.23	1	0	2
21.25	0	2	1
21.27	0	1	2
21.29	3	1	0
21.31	1	0	1
21.33	0	1	0
21.35	1	1	1
21.37	0	0	1
21.39	2	1	0
21.41	2	1	0
21.43	1	2	1
21.45	1	2	3
21.47	0	1	0
21.49	4	0	1
21.51	2	1	1
21.53	0	2	1
21.55	3	1	2
21.57	2	0	0
21.59	1	2	0
21.61	0	1	2
21.63	2	0	4
21.65	0	3	0
21.67	2	2	3
21.69	2	3	2
21.71	1	0	0
21.73	0	1	2
21.75	2	0	2
21.77	4	3	1
21.79	2	1	1
21.81	0	1	0
21.83	2	0	0
21.85	4	2	0
21.87	0	1	0
21.89	4	0	0
21.91	2	1	1
21.93	0	1	0
21.95	1	1	0
21.97	1	1	0
21.99	0	3	3
22.01	1	1	2
22.03	0	3	1
22.05	1	0	0
22.07	0	0	4
22.09	1	1	2
22.11	2	1	3
22.13	1	1	3
22.15	0	1	0
22.17	1	0	2
22.19	0	2	0
22.21	0	0	0
22.23	1	1	2
22.25	1	1	2
22.27	1	2	1
22.29	1	1	1
22.31	3	3	2
22.33	1	1	5
22.35	1	1	1
22.37	1	3	1
22.39	0	0	1
22.41	4	1	1
22.43	0	0	0
22.45	1	1	0
22.47	4	1	1
22.49	0	1	0
22.51	1	1	0
22.53	0	1	1
22.55	1	2	2
22.57	0	0	1
22.59	0	0	0
22.61	2	2	3
22.63	0	2	1
22.65	0	0	1
22.67	0	2	0
22.69	2	2	0
22.71	0	2	1
22.73	0	0	0
22.75	1	1	3
22.77	0	0	2
22.79	2	0	0
22.81	3	1	0
22.83	1	1	0
22.85	1	0	0
22.87	2	1	1
22.89	1	0	1
22.91	1	4	0
22.93	0	1	0
22.95	0	3	1
22.97	0	2	1
22.99	1	1	2
23.01	3	0	0
23.03	0	1	1
23.05	2	1	3
23.07	0	4	1
23.09	0	2	3
23.11	1	1	0
23.13	0	0	1
23.15	0	1	1
23.17	0	2	0
23.19	1	3	3
23.21	0	0	0
23.23	0	0	0
23.25	1	0	2
23.27	2	3	0
23.29	3	1	1
23.31	2	0	2
23.33	0	1	1
23.35	0	3	0
23.37	0	3	0
23.39	3	0	2
23.41	5	1	0
23.43	2	1	1
23.45	0	1	0
23.47	1	0	1
23.49	0	2	1
23.51	5	1	0
23.53	0	2	1
23.55	0	1	1
23.57	2	1	4
23.59	1	1	2
23.61	0	2	2
23.63	3	3	1
23.65	0	0	1
23.67	1	2	1
23.69	2	0	1
23.71	1	1	2
23.73	1	1	0
23.75	0	1	3
23.77	1	1	1
23.79	0	2	1
23.81	0	2	0
23.83	3	3	0
23.85	1	1	1
23.87	0	1	0
23.89	2	4	2
23.91	3	1	1
23.93	0	4	2
23.95	0	0	0
23.97	0	0	1
23.99	0	1	1
24.01	0	0	1
24.03	0	2	1
24.05	1	0	1
24.07	0	1	0
24.09	3	0	1
24.11	1	2	0
24.13	0	1	0
24.15	1	1	0
24.17	2	0	0
24.19	0	1	2
24.21	0	2	0
24.23	2	1	0
24.25	3	3	3
24.27	0	1	1
24.29	0	1	1
24.31	0	1	2
24.33	0	1	3
24.35	1	2	1
24.37	1	1	0
24.39	1	2	0
24.41	0	0	1
24.43	1	0	1
24.45	0	2	1
24.47	2	1	1
24.49	1	1	1
24.51	1	1	0
24.53	2	0	3
24.55	7	2	2
24.57	1	2	2
24.59	3	2	0
24.61	3	1	0
24.63	2	1	0
24.65	0	0	2
24.67	2	6	0
24.69	0	4	1
24.71	0	0	0
24.73	0	2	0
24.75	0	1	1
24.77	0	1	1
24.79	0	0	0
24.81	0	1	1
24.83	1	2	1
24.85	0	0	3
24.87	0	0	2
24.89	4	2	2
24.91	0	0	1
24.93	3	2	0
24.95	0	1	0
24.97	0	2	2
24.99	2	1	3
25.01	1	4	2
25.03	1	1	1
25.05	2	0	1
25.07	1	1	0
25.09	6	1	1
25.11	1	2	0
25.13	0	3	0
25.15	0	1	3
25.17	0	1	2
25.19	0	1	1
25.21	0	1	1
25.23	2	2	0
25.25	2	0	2
25.27	0	0	2
25.29	1	1	3
25.31	2	0	0
25.33	0	2	1
25.35	1	1	0
25.37	0	1	0
25.39	1	0	2
25.41	1	1	2
25.43	0	1	1
25.45	0	0	0
25.47	0	2	1
25.49	3	1	0
25.51	0	1	0
25.53	0	2	1
25.55	3	1	0
25.57	0	0	0
25.59	0	1	0
25.61	1	2	2
25.63	0	2	0
25.65	1	0	1
25.67	1	1	1
25.69	1	0	2
25.71	1	1	0
25.73	0	1	1
25.75	0	1	1
25.77	2	1	2
25.79	0	1	1
25.81	0	0	2
25.83	0	0	0
25.85	1	4	0
25.87	0	1	1
25.89	2	2	1
25.91	1	0	0
25.93	2	0	0
25.95	0	0	1
25.97	1	0	1
25.99	1	1	0
26.01	0	1	0
26.03	0	0	1
26.05	0	0	1
26.07	0	0	3
26.09	0	1	3
26.11	1	1	0
26.13	0	1	2
26.15	1	0	1
26.17	3	0	3
26.19	0	1	0
26.21	3	0	1
26.23	0	0	0
26.25	0	1	0
26.27	1	0	1
26.29	0	1	0
26.31	2	1	1
26.33	0	2	0
26.35	0	2	1
26.37	2	0	2
26.39	2	1	1
26.41	1	0	1
26.43	0	0	0
26.45	1	3	0
26.47	1	1	0
26.49	1	1	1
26.51	0	1	1
26.53	0	2	0
26.55	1	1	0
26.57	3	0	1
26.59	0	0	1
26.61	0	0	0
26.63	1	2	0
26.65	1	1	0
26.67	1	3	3
26.69	1	2	0
26.71	1	2	1
26.73	2	1	0
26.75	0	2	1
26.77	0	3	1
26.79	0	0	1
26.81	2	1	0
26.83	0	0	2
26.85	1	1	2
26.87	0	0	1
26.89	1	1	0
26.91	0	0	1
26.93	1	7	0
26.95	3	1	0
26.97	0	1	0
26.99	1	0	0
27.01	1	3	0
27.03	0	1	0
27.05	2	1	0
27.07	1	0	0
27.09	1	3	1
27.11	0	1	1
27.13	0	0	1
27.15	2	0	0
27.17	0	1	0
27.19	1	1	0
27.21	0	2	0
27.23	1	3	4
27.25	0	2	1
27.27	0	0	0
27.29	0	0	0
27.31	1	0	1
27.33	1	1	1
27.35	1	1	2
27.37	1	1	0
27.39	4	1	2
27.41	1	1	0
27.43	0	0	1
27.45	2	2	1
27.47	3	1	0
27.49	1	4	0
27.51	3	2	0
27.53	0	2	0
27.55	0	0	0
27.57	0	3	1
27.59	2	0	4
27.61	2	1	3
27.63	0	0	1
27.65	0	0	2
27.67	0	2	1
27.69	3	0	1
27.71	2	4	1
27.73	3	1	0
27.75	2	6	1
27.77	2	4	1
27.79	0	2	1
27.81	0	1	0
27.83	1	2	1
27.85	1	1	4
27.87	1	7	2
27.89	1	6	0
27.91	2	2	3
27.93	0	4	1
27.95	4	8	1
27.97	3	11	2
27.99	2	7	1
28.01	4	2	0
28.03	1	5	0
28.05	1	7	1
28.07	4	1	0
28.09	2	2	1
28.11	1	0	0
28.13	0	0	2
28.15	3	2	0
28.17	2	1	1
28.19	0	3	3
28.21	2	3	0
28.23	0	3	0
28.25	0	0	0
28.27	0	0	2
28.29	3	0	1
28.31	2	1	0
28.33	2	3	0
28.35	0	2	1
28.37	2	2	0
28.39	1	1	0
28.41	2	0	2
28.43	1	1	0
28.45	1	0	0
28.47	2	1	1
28.49	0	5	1
28.51	0	3	0
28.53	0	0	1
28.55	1	0	1
28.57	1	1	0
28.59	0	0	1
28.61	1	1	1
28.63	0	0	0
28.65	0	2	1
28.67	1	1	0
28.69	4	2	0
28.71	2	1	0
28.73	3	2	0
28.75	0	0	0
28.77	3	1	0
28.79	1	1	0
28.81	2	1	1
28.83	4	3	0
28.85	0	6	0
28.87	0	2	2
28.89	1	2	0
28.91	0	1	0
28.93	1	2	0
28.95	3	1	0
28.97	1	0	0
28.99	0	2	1
29.01	2	1	0
29.03	0	1	0
29.05	0	1	1
29.07	0	2	1
29.09	2	2	0
29.11	2	2	0
29.13	0	0	1
29.15	0	1	1
29.17	0	2	0
29.19	2	2	0
29.21	1	2	0
29.23	0	0	1
29.25	2	1	1
29.27	0	1	2
29.29	1	3	3
29.31	0	3	0
29.33	0	1	0
29.35	0	2	1
29.37	2	1	1
29.39	1	2	1
29.41	1	5	1
29.43	0	4	0
29.45	0	4	1
29.47	1	5	4
29.49	0	5	1
29.51	2	7	1
29.53	0	8	1
29.55	0	4	3
29.57	3	7	1
29.59	2	4	2
29.61	4	8	2
29.63	2	7	1
29.65	2	4	1
29.67	1	7	2
29.69	2	7	0
29.71	3	8	4
29.73	1	6	1
29.75	0	5	2
29.77	0	4	2
29.79	1	3	1
29.81	1	4	1
29.83	0	4	0
29.85	1	5	4
29.87	0	2	1
29.89	0	2	0
29.91	2	2	0
29.93	2	2	0
29.95	0	1	1
29.97	1	2	1
29.99	1	3	1
30.01	1	2	0
30.03	1	1	0
30.05	2	1	0
30.07	1	2	0
30.09	1	2	1
30.11	1	3	1
30.13	1	4	2
30.15	1	3	1
30.17	0	4	1
30.19	2	1	2
30.21	4	1	1
30.23	2	2	1
30.25	1	2	1
30.27	2	2	0
30.29	2	2	2
30.31	0	3	1
30.33	2	3	0
30.35	2	4	0
30.37	2	0	1
30.39	2	1	2
30.41	1	2	2
30.43	1	0	1
30.45	0	1	0
30.47	0	3	0
30.49	0	1	1
30.51	1	1	0
30.53	0	3	0
30.55	0	1	2
30.57	2	0	1
30.59	1	5	1
30.61	0	5	0
30.63	0	1	0
30.65	2	2	0
30.67	0	3	1
30.69	0	4	0
30.71	2	3	0
30.73	1	0	0
30.75	3	2	2
30.77	0	0	0
30.79	0	2	0
30.81	3	0	0
30.83	1	2	0
30.85	1	1	1
30.87	2	0	0
30.89	1	0	1
30.91	3	1	1
30.93	2	2	3
30.95	1	2	3
30.97	0	2	0
30.99	2	1	0
31.01	0	0	1
31.03	1	1	0
31.05	0	4	1
31.07	0	1	0
31.09	0	0	1
31.11	0	1	2
31.13	0	1	0
31.15	1	1	2
31.17	3	0	2
31.19	1	3	2
31.21	2	2	1
31.23	1	0	1
31.25	0	0	1
31.27	0	0	0
31.29	3	0	0
31.31	2	2	0
31.33	3	0	1
31.35	0	0	0
31.37	2	2	1
31.39	0	0	0
31.41	0	5	0
31.43	0	0	2
31.45	0	0	0
31.47	1	1	0
31.49	1	3	3
31.51	1	1	3
31.53	1	3	0
31.55	0	1	1
31.57	1	1	0
31.59	0	2	0
31.61	0	4	2
31.63	1	0	0
31.65	2	2	1
31.67	1	2	0
31.69	1	0	1
31.71	0	2	0
31.73	5	0	0
31.75	2	1	1
31.77	9	1	2
31.79	4	3	2
31.81	0	1	3
31.83	3	1	1
31.85	0	0	6
31.87	4	0	4
31.89	0	0	3
31.91	3	0	1
31.93	0	3	1
31.95	6	0	3
31.97	2	1	2
31.99	3	1	0
32.01	4	1	1
32.03	1	4	1
32.05	2	2	1
32.07	1	2	2
32.09	4	2	3
32.11	3	0	0
32.13	2	1	1
32.15	1	3	1
32.17	4	3	0
32.19	0	1	0
32.21	1	3	0
32.23	1	1	0
32.25	1	1	1
32.27	0	1	2
32.29	1	0	0
32.31	2	0	2
32.33	5	0	0
32.35	1	0	3
32.37	6	3	0
32.39	6	2	1
32.41	3	1	2
32.43	1	1	2
32.45	6	1	0
32.47	3	2	1
32.49	5	1	1
32.51	4	6	2
32.53	2	2	0
32.55	3	3	1
32.57	2	1	0
32.59	3	4	0
32.61	3	1	3
32.63	2	3	1
32.65	0	0	2
32.67	1	0	0
32.69	2	0	2
32.71	1	2	0
32.73	2	1	0
32.75	1	2	0
32.77	3	1	0
32.79	2	1	0
32.81	2	1	0
32.83	1	5	0
32.85	0	3	1
32.87	0	2	2
32.89	3	2	0
32.91	1	1	1
32.93	1	0	1
32.95	1	1	2
32.97	2	1	1
32.99	2	1	0
33.01	0	0	1
33.03	0	1	0
33.05	1	1	1
33.07	0	0	2
33.09	3	1	0
33.11	0	1	0
33.13	0	2	1
33.15	0	3	1
33.17	3	2	1
33.19	1	0	1
33.21	2	0	1
33.23	2	1	0
33.25	1	6	1
33.27	2	1	1
33.29	2	2	1
33.31	1	2	2
33.33	2	3	1
33.35	2	1	0
33.37	2	4	2
33.39	1	2	0
33.41	1	0	0
33.43	2	1	0
33.45	0	4	0
33.47	1	1	0
33.49	3	0	2
33.51	3	0	1
33.53	1	2	1
33.55	2	1	2
33.57	0	1	0
33.59	0	2	2
33.61	2	1	0
33.63	1	0	0
33.65	1	2	1
33.67	0	0	0
33.69	0	2	0
33.71	1	0	2
33.73	2	0	1
33.75	0	0	0
33.77	2	1	1
33.79	0	0	2
33.81	2	0	1
33.83	2	0	0
33.85	1	0	2
33.87	3	0	0
33.89	2	2	2
33.91	1	1	2
33.93	1	0	1
33.95	1	0	0
33.97	4	1	2
33.99	1	1	0
34.01	1	1	3
34.03	2	3	0
34.05	0	3	0
34.07	2	0	1
34.09	0	0	0
34.11	3	0	1
34.13	1	0	0
34.15	1	2	0
34.17	2	0	2
34.19	2	2	1
34.21	0	0	0
34.23	0	0	1
34.25	0	1	1
34.27	0	0	1
34.29	0	2	0
34.31	1	0	1
34.33	1	0	1
34.35	2	1	0
34.37	1	0	1
34.39	2	3	1
34.41	1	2	1
34.43	0	3	2
34.45	3	2	1
34.47	0	4	2
34.49	4	1	1
34.51	2	1	1
34.53	2	0	1
34.55	2	1	2
34.57	3	1	1
34.59	3	0	1
34.61	2	2	1
34.63	0	1	0
34.65	3	0	0
34.67	0	1	0
34.69	2	2	1
34.71	1	0	0
34.73	1	1	2
34.75	2	0	0
34.77	0	4	0
34.79	0	0	2
34.81	0	0	0
34.83	0	3	1
34.85	2	1	1
34.87	2	0	1
34.89	1	1	0
34.91	1	1	0
34.93	1	1	1
34.95	4	2	3
34.97	2	2	1
34.99	1	3	1
35.01	0	1	2
35.03	1	1	1
35.05	0	0	5
35.07	2	2	2
35.09	1	0	0
35.11	0	1	4
35.13	0	2	1
35.15	0	1	1
35.17	0	1	2
35.19	1	1	2
35.21	1	2	1
35.23	1	3	2
35.25	0	0	2
35.27	2	4	1
35.29	2	0	1
35.31	0	3	1
35.33	5	0	1
35.35	2	4	3
35.37	2	1	0
35.39	1	1	0
35.41	1	2	0
35.43	0	1	1
35.45	1	5	0
35.47	1	1	1
35.49	1	2	2
35.51	1	0	1
35.53	1	0	1
35.55	1	1	2
35.57	1	2	1
35.59	0	4	1
35.61	2	3	1
35.63	1	2	1
35.65	2	0	3
35.67	3	2	5
35.69	1	1	2
35.71	3	3	2
35.73	4	2	2
35.75	5	1	0
35.77	2	2	0
35.79	0	0	2
35.81	3	2	1
35.83	1	1	3
35.85	4	2	1
35.87	2	0	2
35.89	3	1	2
35.91	1	1	0
35.93	2	1	1
35.95	3	2	2
35.97	1	2	1
35.99	1	0	1
36.01	4	2	4
36.03	1	2	2
36.05	0	0	2
36.07	1	1	1
36.09	4	5	2
36.11	3	2	2
36.13	3	2	2
36.15	1	3	2
36.17	2	3	1
36.19	4	3	1
36.21	4	1	2
36.23	4	0	5
36.25	3	1	3
36.27	3	1	3
36.29	1	2	0
36.31	6	2	1
36.33	5	2	0
36.35	1	2	0
36.37	1	4	2
36.39	4	4	0
36.41	1	0	2
36.43	5	2	2
36.45	0	1	3
36.47	3	3	3
36.49	7	8	2
36.51	3	4	4
36.53	6	2	3
36.55	5	4	0
36.57	4	4	8
36.59	6	3	6
36.61	4	2	2
36.63	7	2	3
36.65	12	6	6
36.67	8	3	4
36.69	7	8	5
36.71	6	3	6
36.73	2	1	3
36.75	3	0	2
36.77	3	1	1
36.79	2	2	5
36.81	1	3	5
36.83	4	2	7
36.85	6	4	3
36.87	6	3	5
36.89	4	3	0
36.91	5	1	2
36.93	1	2	2
36.95	7	3	3
36.97	7	2	3
36.99	1	1	4
37.01	6	2	6
37.03	2	0	4
37.05	1	4	3
37.07	5	3	2
37.09	2	3	1
37.11	4	3	2
37.13	4	4	2
37.15	1	1	3
37.17	5	1	0
37.19	5	1	1
37.21	6	0	2
37.23	6	3	3
37.25	4	2	1
37.27	8	0	2
37.29	6	3	0
37.31	4	2	4
37.33	1	2	1
37.35	7	1	0
37.37	6	3	5
37.39	5	1	3
37.41	7	2	3
37.43	9	6	2
37.45	5	0	3
37.47	5	5	6
37.49	7	2	7
37.51	7	1	5
37.53	9	3	2
37.55	6	4	4
37.57	7	4	4
37.59	10	5	3
37.61	5	6	4
37.63	7	3	6
37.65	8	1	7
37.67	2	0	8
37.69	8	2	5
37.71	6	6	1
37.73	8	10	2
37.75	9	8	8
37.77	8	2	7
37.79	11	6	8
37.81	18	2	7
37.83	8	6	8
37.85	7	3	8
37.87	16	15	4
37.89	12	15	15
37.91	13	18	5
37.93	13	19	10
37.95	26	12	9
37.97	28	17	9
37.99	24	19	18
38.01	22	24	17
38.03	23	23	14
38.05	32	13	17
38.07	37	26	12
38.09	40	38	19
38.11	44	44	20
38.13	66	56	37
38.15	67	65	36
38.17	76	67	59
38.19	92	94	58
38.21	114	123	85
38.23	128	137	110
38.25	135	193	159
38.27	154	180	204
38.29	193	212	246
38.31	213	232	296
38.33	234	178	240
38.35	188	167	188
38.37	188	156	188
38.39	142	134	159
38.41	132	124	151
38.43	139	87	139
38.45	92	65	90
38.47	88	62	66
38.49	67	54	42
38.51	53	45	36
38.53	49	34	28
38.55	40	45	38
38.57	25	49	34
38.59	41	34	21
38.61	32	33	22
38.63	22	28	19
38.65	21	21	12
38.67	24	22	18
38.69	16	18	7
38.71	16	17	12
38.73	13	14	11
38.75	18	12	8
38.77	21	21	4
38.79	17	18	11
38.81	19	19	12
38.83	14	7	7
38.85	11	5	4
38.87	6	7	5
38.89	13	2	3
38.91	7	2	1
38.93	4	7	6
38.95	8	5	5
38.97	7	4	4
38.99	9	2	6
39.01	5	3	8
39.03	10	4	9
39.05	4	6	4
39.07	14	3	4
39.09	5	4	4
39.11	2	2	5
39.13	3	0	2
39.15	4	1	6
39.17	3	2	3
39.19	7	0	2
39.21	7	1	4
39.23	8	2	3
39.25	1	2	1
39.27	2	0	1
39.29	6	1	1
39.31	4	1	1
39.33	5	2	0
39.35	4	0	4
39.37	7	2	1
39.39	0	4	1
39.41	6	2	4
39.43	2	5	2
39.45	3	3	3
39.47	10	6	3
39.49	5	0	1
39.51	3	2	0
39.53	3	5	1
39.55	1	4	1
39.57	3	6	2
39.59	2	2	1
39.61	3	2	3
39.63	6	1	5
39.65	1	1	4
39.67	3	1	0
39.69	2	4	4
39.71	7	3	3
39.73	5	0	2
39.75	5	2	0
39.77	2	1	2
39.79	2	1	1
39.81	4	0	3
39.83	1	1	3
39.85	4	0	2
39.87	3	1	0
39.89	2	4	1
39.91	3	1	2
39.93	5	2	5
39.95	6	1	1
39.97	0	1	2
39.99	5	2	3
40.01	2	1	1
40.03	6	1	4
40.05	1	1	2
40.07	3	2	2
40.09	3	0	1
40.11	3	2	2
40.13	2	0	4
40.15	4	2	3
40.17	1	0	0
40.19	1	0	0
40.21	4	2	0
40.23	5	2	1
40.25	2	0	3
40.27	2	1	1
40.29	2	2	1
40.31	2	1	1
40.33	0	2	1
40.35	1	2	3
40.37	1	1	3
40.39	4	0	2
40.41	1	1	1
40.43	2	1	2
40.45	4	1	1
40.47	3	1	0
40.49	2	1	2
40.51	3	2	3
40.53	0	3	1
40.55	5	0	0
40.57	6	3	2
40.59	3	4	1
40.61	0	3	5
40.63	4	2	1
40.65	0	1	3
40.67	4	2	4
40.69	3	3	0
40.71	3	3	1
40.73	6	1	1
40.75	6	4	1
40.77	2	1	1
40.79	5	1	1
40.81	1	3	1
40.83	6	3	2
40.85	3	2	1
40.87	4	2	0
40.89	3	1	0
40.91	4	0	1
40.93	3	1	1
40.95	1	3	1
40.97	4	1	0
40.99	3	2	1
41.01	4	0	2
41.03	2	5	0
41.05	1	1	2
41.07	5	0	0
41.09	1	0	2
41.11	2	1	2
41.13	4	1	1
41.15	0	2	3
41.17	1	2	1
41.19	0	1	3
41.21	2	1	4
41.23	2	2	1
41.25	1	3	1
41.27	1	2	5
41.29	0	3	3
41.31	3	1	0
41.33	0	2	3
41.35	2	2	0
41.37	0	3	1
41.39	1	2	2
41.41	1	2	2
41.43	1	4	0
41.45	1	3	0
41.47	0	5	1
41.49	4	2	1
41.51	1	4	1
41.53	2	2	1
41.55	3	1	1
41.57	5	3	1
41.59	3	1	2
41.61	0	2	1
41.63	1	0	1
41.65	1	1	1
41.67	0	0	1
41.69	1	3	0
41.71	3	2	2
41.73	2	0	3
41.75	2	2	2
41.77	2	2	2
41.79	2	3	1
41.81	1	4	2
41.83	2	2	2
41.85	3	1	1
41.87	3	5	1
41.89	5	2	2
41.91	4	1	1
41.93	4	1	1
41.95	6	0	4
41.97	6	2	1
41.99	3	1	0
42.01	0	3	0
42.03	1	2	3
42.05	4	1	1
42.07	2	1	3
42.09	1	6	2
42.11	5	5	1
42.13	2	4	1
42.15	5	3	0
42.17	2	0	2
42.19	3	3	2
42.21	3	1	3
42.23	2	4	2
42.25	2	5	2
42.27	2	3	5
42.29	3	3	4
42.31	4	1	4
42.33	1	2	3
42.35	1	4	6
42.37	3	1	1
42.39	2	5	3
42.41	6	1	4
42.43	3	6	1
42.45	3	1	3
42.47	1	3	4
42.49	2	6	4
42.51	3	2	2
42.53	1	2	3
42.55	5	5	3
42.57	1	3	3
42.59	3	4	7
42.61	3	4	4
42.63	2	4	3
42.65	1	4	4
42.67	7	2	1
42.69	2	3	4
42.71	5	3	2
42.73	3	4	0
42.75	7	2	2
42.77	5	3	4
42.79	5	4	3
42.81	3	3	4
42.83	7	4	1
42.85	1	2	6
42.87	2	4	1
42.89	2	3	3
42.91	0	2	1
42.93	5	2	1
42.95	4	3	2
42.97	2	1	4
42.99	2	0	4
43.01	7	2	1
43.03	4	0	5
43.05	5	3	7
43.07	2	5	2
43.09	2	1	3
43.11	2	2	2
43.13	4	3	0
43.15	2	1	4
43.17	2	3	3
43.19	4	1	3
43.21	3	0	3
43.23	9	1	3
43.25	2	2	1
43.27	1	3	1
43.29	2	4	3
43.31	4	1	1
43.33	3	2	3
43.35	3	2	6
43.37	10	2	3
43.39	0	0	2
43.41	6	2	2
43.43	9	1	4
43.45	1	1	3
43.47	4	3	1
43.49	2	0	1
43.51	1	3	2
43.53	5	3	2
43.55	6	2	4
43.57	5	2	2
43.59	5	0	0
43.61	2	1	2
43.63	4	3	1
43.65	4	4	2
43.67	7	3	6
43.69	6	0	5
43.71	8	5	5
43.73	5	6	0
43.75	3	7	4
43.77	2	3	4
43.79	3	3	2
43.81	5	3	4
43.83	7	3	5
43.85	1	3	4
43.87	8	1	4
43.89	8	7	2
43.91	4	5	4
43.93	12	5	1
43.95	10	5	4
43.97	9	9	5
43.99	9	8	2
44.01	13	4	1
44.03	9	10	4
44.05	3	13	6
44.07	14	8	4
44.09	6	7	7
44.11	17	12	5
44.13	13	12	11
44.15	17	12	9
44.17	10	12	5
44.19	16	16	13
44.21	25	15	13
44.23	21	17	10
44.25	16	24	10
44.27	34	29	22
44.29	26	30	26
44.31	27	35	32
44.33	32	35	28
44.35	35	44	30
44.37	37	44	35
44.39	44	45	38
44.41	48	56	48
44.43	55	71	71
44.45	56	79	85
44.47	56	77	92
44.49	76	85	130
44.51	76	96	117
44.53	59	118	92
44.55	74	87	86
44.57	59	67	66
44.59	44	52	79
44.61	46	59	53
44.63	49	65	66
44.65	34	61	55
44.67	48	52	36
44.69	32	45	26
44.71	24	41	18
44.73	26	34	17
44.75	26	23	10
44.77	15	17	18
44.79	19	24	16
44.81	13	23	16
44.83	11	17	5
44.85	16	16	11
44.87	7	15	7
44.89	19	13	5
44.91	7	9	12
44.93	11	7	3
44.95	7	8	3
44.97	7	7	6
44.99	9	4	6
45.01	6	5	2
45.03	5	2	3
45.05	7	5	6
45.07	3	3	4
45.09	6	0	5
45.11	7	0	1
45.13	6	2	5
45.15	6	1	1
45.17	3	2	7
45.19	7	4	1
45.21	2	3	3
45.23	4	7	5
45.25	6	2	2
45.27	3	2	4
45.29	5	2	2
45.31	6	1	0
45.33	5	3	6
45.35	3	3	1
45.37	3	1	2
45.39	4	3	3
45.41	5	1	3
45.43	3	0	2
45.45	5	4	2
45.47	4	5	0
45.49	3	3	3
45.51	4	1	3
45.53	3	1	2
45.55	3	3	3
45.57	2	2	3
45.59	3	3	3
45.61	2	3	1
45.63	4	3	3
45.65	2	0	1
45.67	1	3	3
45.69	5	4	1
45.71	1	0	1
45.73	1	3	4
45.75	2	0	3
45.77	4	4	0
45.79	4	1	1
45.81	1	2	2
45.83	1	1	1
45.85	4	4	2
45.87	0	2	0
45.89	1	2	2
45.91	2	0	4
45.93	3	4	1
45.95	1	1	3
45.97	2	5	1
45.99	1	1	2
46.01	6	0	2
46.03	1	0	1
46.05	3	4	0
46.07	1	1	0
46.09	3	3	1
46.11	3	1	2
46.13	5	2	0
46.15	2	2	0
46.17	0	1	3
46.19	1	0	1
46.21	2	0	1
46.23	3	1	1
46.25	3	2	1
46.27	2	0	1
46.29	2	0	1
46.31	6	3	0
46.33	3	1	2
46.35	2	1	1
46.37	5	2	1
46.39	2	1	0
46.41	3	1	0
46.43	3	0	1
46.45	5	0	0
46.47	4	0	0
46.49	2	2	1
46.51	2	3	3
46.53	2	3	2
46.55	7	5	2
46.57	2	6	1
46.59	3	1	3
46.61	2	2	2
46.63	1	1	1
46.65	0	4	0
46.67	0	3	0
46.69	0	1	0
46.71	1	4	1
46.73	1	2	1
46.75	0	2	1
46.77	1	0	1
46.79	2	2	0
46.81	0	3	0
46.83	0	1	0
46.85	1	2	4
46.87	5	3	2
46.89	3	3	0
46.91	1	1	2
46.93	1	0	1
46.95	0	0	0
46.97	5	0	1
46.99	3	1	0
47.01	3	2	0
47.03	0	0	0
47.05	2	0	1
47.07	3	0	2
47.09	0	1	2
47.11	3	0	2
47.13	2	5	0
47.15	1	0	0
47.17	1	4	2
47.19	0	4	1
47.21	2	1	2
47.23	0	3	0
47.25	0	2	0
47.27	2	3	3
47.29	0	3	0
47.31	1	1	0
47.33	0	1	1
47.35	0	1	0
47.37	1	2	1
47.39	0	4	0
47.41	1	2	0
47.43	1	1	2
47.45	2	1	1
47.47	0	0	0
47.49	1	1	1
47.51	3	2	0
47.53	2	1	2
47.55	1	1	0
47.57	0	1	0
47.59	1	2	0
47.61	0	3	2
47.63	0	1	2
47.65	0	5	0
47.67	3	5	0
47.69	5	2	3
47.71	1	2	0
47.73	1	2	0
47.75	0	3	3
47.77	1	2	0
47.79	2	3	0
47.81	1	1	1
47.83	0	0	1
47.85	1	3	3
47.87	0	0	0
47.89	1	4	2
47.91	1	3	0
47.93	1	4	3
47.95	1	2	0
47.97	2	1	3
47.99	2	1	1
48.01	1	0	0
48.03	0	1	1
48.05	1	1	2
48.07	2	2	1
48.09	2	4	2
48.11	1	0	1
48.13	0	0	1
48.15	1	1	1
48.17	1	1	2
48.19	0	4	3
48.21	2	1	1
48.23	2	2	0
48.25	0	1	0
48.27	1	0	1
48.29	0	2	3
48.31	0	0	0
48.33	1	1	0
48.35	3	0	1
48.37	1	4	2
48.39	0	1	0
48.41	2	0	0
48.43	1	0	4
48.45	2	3	0
48.47	4	1	0
48.49	3	1	1
48.51	1	1	0
48.53	1	1	1
48.55	0	1	0
48.57	2	3	0
48.59	2	1	3
48.61	1	5	2
48.63	3	1	2
48.65	5	0	2
48.67	1	5	2
48.69	3	2	3
48.71	0	1	0
48.73	0	5	2
48.75	0	3	0
48.77	0	0	0
48.79	1	2	0
48.81	0	2	0
48.83	0	2	0
48.85	3	2	2
48.87	0	1	1
48.89	0	3	2
48.91	0	0	0
48.93	0	0	0
48.95	1	1	1
48.97	0	2	0
48.99	2	3	2
49.01	3	0	0
49.03	1	2	0
49.05	3	3	0
49.07	0	2	0
49.09	2	1	2
49.11	2	1	0
49.13	2	0	0
49.15	1	2	0
49.17	0	2	1
49.19	0	3	2
49.21	2	0	1
49.23	1	0	0
49.25	1	1	0
49.27	1	2	2
49.29	1	2	1
49.31	0	0	0
49.33	1	3	1
49.35	3	4	1
49.37	1	1	5
49.39	1	3	2
49.41	2	2	0
49.43	2	3	0
49.45	1	2	1
49.47	1	2	0
49.49	0	1	2
49.51	0	2	0
49.53	0	3	0
49.55	0	2	0
49.57	0	2	1
49.59	2	3	0
49.61	0	2	1
49.63	0	3	2
49.65	3	2	0
49.67	0	1	1
49.69	0	4	1
49.71	2	0	0
49.73	1	0	1
49.75	1	2	1
49.77	2	3	0
49.79	0	0	2
49.81	2	1	0
49.83	2	1	0
49.85	0	4	2
49.87	0	1	0
49.89	0	2	2
49.91	0	3	1
49.93	0	0	3
49.95	1	1	1
49.97	2	2	2
49.99	0	3	3
50.01	0	1	0
50.03	0	1	0
50.05	1	4	0
50.07	2	0	0
50.09	1	2	0
50.11	2	0	2
50.13	1	0	0
50.15	1	4	0
50.17	0	4	0
50.19	0	3	0
50.21	1	2	2
50.23	0	2	1
50.25	0	0	0
50.27	2	3	3
50.29	0	2	0
50.31	2	1	0
50.33	3	3	2
50.35	0	3	0
50.37	0	0	3
50.39	0	0	2
50.41	0	0	2
50.43	1	3	2
50.45	0	2	1
50.47	0	2	2
50.49	0	0	0
50.51	0	0	2
50.53	0	2	0
50.55	2	1	0
50.57	1	1	1
50.59	1	0	3
50.61	2	0	2
50.63	0	0	1
50.65	1	0	2
50.67	0	2	1
50.69	2	0	0
50.71	2	5	1
50.73	0	0	0
50.75	2	1	0
50.77	1	1	1
50.79	0	1	0
50.81	1	1	1
50.83	1	0	1
50.85	0	2	0
50.87	1	1	0
50.89	0	1	2
50.91	1	4	1
50.93	2	2	3
50.95	1	0	2
50.97	0	2	1
50.99	1	2	0
51.01	0	4	0
51.03	0	4	2
51.05	1	2	0
51.07	0	4	1
51.09	1	2	2
51.11	1	1	3
51.13	0	1	1
51.15	2	3	0
51.17	2	0	0
51.19	1	0	0
51.21	0	0	0
51.23	2	2	0
51.25	2	1	2
51.27	1	4	0
51.29	1	0	0
51.31	3	0	1
51.33	0	0	1
51.35	2	0	1
51.37	1	2	0
51.39	1	4	0
51.41	1	1	1
51.43	2	1	2
51.45	0	1	1
51.47	1	4	1
51.49	1	3	1
51.51	0	0	0
51.53	2	0	3
51.55	1	2	0
51.57	0	0	0
51.59	0	0	0
51.61	1	3	1
51.63	0	1	1
51.65	0	2	1
51.67	1	1	3
51.69	0	1	5
51.71	1	3	1
51.73	0	1	0
51.75	2	0	3
51.77	1	1	0
51.79	1	2	2
51.81	1	0	0
51.83	2	1	2
51.85	0	0	2
51.87	0	1	2
51.89	1	3	1
51.91	1	3	2
51.93	0	1	0
51.95	2	1	1
51.97	1	0	4
51.99	0	1	2
52.01	1	2	0
52.03	2	2	1
52.05	2	1	1
52.07	0	2	0
52.09	0	1	1
52.11	1	1	1
52.13	0	0	0
52.15	1	2	0
52.17	1	1	0
52.19	0	3	0
52.21	0	1	0
52.23	0	2	4
52.25	0	2	0
52.27	1	3	4
52.29	2	0	1
52.31	2	2	1
52.33	1	3	3
52.35	2	3	0
52.37	0	2	2
52.39	2	0	0
52.41	1	1	0
52.43	1	1	0
52.45	0	3	0
52.47	1	1	0
52.49	0	1	0
52.51	1	2	1
52.53	3	2	1
52.55	2	3	0
52.57	0	2	1
52.59	2	1	0
52.61	0	2	1
52.63	1	4	1
52.65	2	1	1
52.67	1	3	1
52.69	1	0	2
52.71	0	0	1
52.73	1	2	1
52.75	0	1	0
52.77	1	1	3
52.79	1	2	1
52.81	1	1	1
52.83	1	3	1
52.85	1	5	3
52.87	1	4	2
52.89	0	0	0
52.91	1	5	0
52.93	1	3	1
52.95	1	3	3
52.97	0	4	1
52.99	0	2	0
53.01	2	6	2
53.03	1	1	1
53.05	0	5	5
53.07	0	2	2
53.09	1	4	4
53.11	0	2	0
53.13	0	3	0
53.15	1	2	0
53.17	3	5	2
53.19	0	3	0
53.21	0	2	4
53.23	0	3	0
53.25	3	2	1
53.27	0	2	2
53.29	0	0	0
53.31	1	4	0
53.33	0	2	0
53.35	1	1	0
53.37	1	3	1
53.39	0	4	2
53.41	1	3	0
53.43	0	3	1
53.45	1	3	2
53.47	0	3	2
53.49	0	1	2
53.51	3	2	0
53.53	0	2	5
53.55	1	2	0
53.57	0	1	2
53.59	0	2	2
53.61	0	3	0
53.63	0	1	0
53.65	0	1	0
53.67	0	1	0
53.69	0	1	1
53.71	0	1	1
53.73	0	1	2
53.75	4	0	0
53.77	1	0	0
53.79	1	2	1
53.81	0	0	0
53.83	1	3	1
53.85	0	2	3
53.87	0	1	2
53.89	1	0	0
53.91	0	3	2
53.93	2	1	2
53.95	0	3	1
53.97	0	1	2
53.99	0	0	3
54.01	0	1	1
54.03	0	1	0
54.05	0	0	0
54.07	1	5	2
54.09	1	2	0
54.11	0	0	3
54.13	0	3	0
54.15	1	0	3
54.17	0	3	2
54.19	3	1	2
54.21	1	2	1
54.23	1	0	1
54.25	1	0	3
54.27	0	1	0
54.29	1	0	0
54.31	0	2	1
54.33	1	2	1
54.35	2	2	0
54.37	0	4	1
54.39	0	0	0
54.41	2	1	0
54.43	0	1	3
54.45	2	1	2
54.47	0	0	3
54.49	0	0	1
54.51	0	1	0
54.53	0	1	3
54.55	2	1	0
54.57	1	1	3
54.59	1	2	1
54.61	0	0	0
54.63	1	2	3
54.65	0	1	2
54.67	1	4	0
54.69	1	1	0
54.71	0	5	1
54.73	1	3	1
54.75	0	0	2
54.77	1	4	2
54.79	0	3	2
54.81	1	3	0
54.83	1	3	0
54.85	0	0	2
54.87	1	2	1
54.89	1	2	0
54.91	3	3	0
54.93	1	4	1
54.95	1	6	0
54.97	1	6	1
54.99	0	4	0
55.01	1	5	0
55.03	1	5	2
55.05	1	3	3
55.07	2	4	0
55.09	1	2	1
55.11	1	5	1
55.13	1	4	1
55.15	4	6	2
55.17	2	3	1
55.19	0	2	1
55.21	0	0	0
55.23	0	4	1
55.25	0	2	1
55.27	0	4	2
55.29	0	2	1
55.31	0	0	2
55.33	1	1	1
55.35	0	2	2
55.37	3	2	1
55.39	0	2	1
55.41	1	2	0
55.43	1	3	3
55.45	0	0	0
55.47	2	0	1
55.49	1	2	2
55.51	0	2	3
55.53	1	1	1
55.55	0	1	1
55.57	0	3	0
55.59	1	2	2
55.61	0	0	2
55.63	2	1	1
55.65	1	4	1
55.67	2	2	1
55.69	0	1	1
55.71	0	1	1
55.73	3	2	1
55.75	1	2	2
55.77	0	0	1
55.79	0	1	0
55.81	0	1	0
55.83	1	0	2
55.85	1	0	4
55.87	2	0	1
55.89	1	2	0
55.91	1	1	2
55.93	2	3	3
55.95	0	3	1
55.97	0	0	1
55.99	0	1	1
56.01	1	0	0
56.03	1	1	1
56.05	1	1	1
56.07	0	0	1
56.09	0	0	1
56.11	0	0	0
56.13	0	2	1
56.15	2	3	0
56.17	1	1	0
56.19	0	2	0
56.21	0	0	2
56.23	0	1	4
56.25	1	1	0
56.27	1	0	0
56.29	3	1	0
56.31	2	2	1
56.33	0	1	1
56.35	2	0	1
56.37	1	4	0
56.39	1	1	0
56.41	1	1	1
56.43	0	2	0
56.45	0	3	1
56.47	1	6	2
56.49	0	2	1
56.51	1	1	2
56.53	0	0	4
56.55	0	2	0
56.57	1	2	2
56.59	1	0	1
56.61	1	1	1
56.63	1	2	4
56.65	1	2	0
56.67	1	1	2
56.69	2	3	1
56.71	2	2	2
56.73	1	0	2
56.75	1	0	1
56.77	0	0	1
56.79	0	2	2
56.81	2	2	4
56.83	0	1	2
56.85	0	1	0
56.87	0	0	0
56.89	0	1	1
56.91	2	2	1
56.93	1	1	1
56.95	1	0	0
56.97	1	1	4
56.99	2	0	0
57.01	1	6	1
57.03	2	0	2
57.05	0	1	0
57.07	0	2	2
57.09	1	3	0
57.11	0	2	0
57.13	0	1	1
57.15	2	3	1
57.17	1	1	0
57.19	0	2	0
57.21	1	1	1
57.23	0	3	1
57.25	0	1	0
57.27	0	2	0
57.29	3	1	3
57.31	2	0	0
57.33	2	2	2
57.35	0	2	1
57.37	3	2	0
57.39	2	0	2
57.41	0	1	0
57.43	1	3	0
57.45	0	5	1
57.47	3	1	0
57.49	0	3	3
57.51	1	3	2
57.53	2	5	2
57.55	2	2	0
57.57	1	6	2
57.59	3	9	1
57.61	2	5	3
57.63	1	6	3
57.65	0	5	1
57.67	1	3	3
57.69	1	4	2
57.71	2	6	1
57.73	2	0	4
57.75	1	4	0
57.77	2	4	0
57.79	0	2	4
57.81	1	0	4
57.83	1	2	1
57.85	1	3	3
57.87	4	3	1
57.89	3	2	1
57.91	0	4	1
57.93	1	1	0
57.95	1	1	0
57.97	1	2	2
57.99	2	2	4
58.01	0	2	2
58.03	0	2	0
58.05	2	4	1
58.07	1	4	2
58.09	2	2	1
58.11	2	1	1
58.13	1	2	1
58.15	0	1	0
58.17	4	1	0
58.19	0	4	2
58.21	1	1	0
58.23	2	1	1
58.25	1	1	2
58.27	0	4	0
58.29	1	1	0
58.31	1	5	2
58.33	1	3	4
58.35	1	3	0
58.37	0	4	0
58.39	0	1	0
58.41	1	2	1
58.43	0	2	1
58.45	3	0	0
58.47	2	2	1
58.49	0	2	1
58.51	0	1	1
58.53	1	2	0
58.55	1	1	0
58.57	0	2	1
58.59	1	2	0
58.61	1	3	0
58.63	1	0	2
58.65	0	1	2
58.67	0	2	0
58.69	1	0	1
58.71	0	1	2
58.73	0	1	1
58.75	1	3	1
58.77	0	0	1
58.79	0	0	1
58.81	3	1	0
58.83	1	1	0
58.85	0	1	0
58.87	1	2	1
58.89	5	0	1
58.91	1	6	4
58.93	2	2	1
58.95	1	1	2
58.97	2	5	0
58.99	0	2	3
59.01	2	0	2
59.03	1	2	0
59.05	2	0	0
59.07	1	0	3
59.09	2	1	2
59.11	1	3	3
59.13	4	0	0
59.15	1	4	0
59.17	0	2	1
59.19	2	4	1
59.21	0	1	0
59.23	2	2	2
59.25	1	1	1
59.27	0	1	1
59.29	1	1	0
59.31	1	2	1
59.33	2	0	1
59.35	0	3	1
59.37	0	0	2
59.39	3	0	0
59.41	1	4	0
59.43	1	2	0
59.45	1	1	1
59.47	0	0	0
59.49	2	2	0
59.51	2	2	1
59.53	5	4	2
59.55	1	2	0
59.57	0	1	3
59.59	1	1	2
59.61	2	2	3
59.63	1	1	0
59.65	3	3	3
59.67	1	5	1
59.69	0	5	1
59.71	2	0	2
59.73	0	2	0
59.75	2	0	1
59.77	2	0	2
59.79	4	4	2
59.81	3	1	1
59.83	3	0	3
59.85	2	2	3
59.87	1	2	1
59.89	4	3	3
59.91	0	0	2
59.93	0	1	2
59.95	2	0	1
[truncated: 1,002 more rows]
